# Supplementary material
Source: MDPI journal article supplement (https://www.mdpi.com/2076-3417/12/6/2785)
Supplement: s1 [file s1 › applsci-1596901-supplementary.pdf]

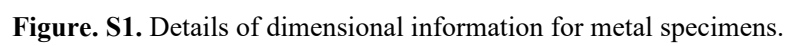

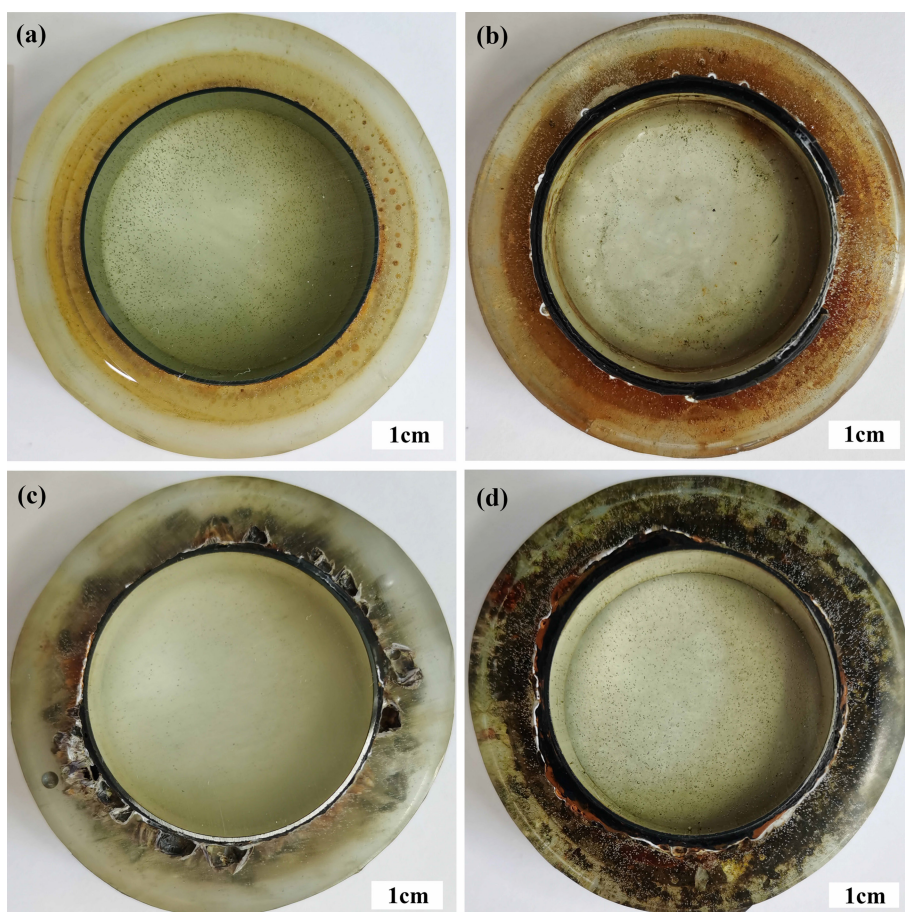

**Figure. S2.** Macro-morphologies on the cross-section of the sensors after exposure in the atmospheric zone (a), the splash zone (b), the tidal zone (c), and the immersion zone (d), respectively.
